# Supplementary material
Source: PubMed Central journal article supplement (PMC6824311)
Supplement: jciinsight-4-130062-s256.pdf [file jciinsight-4-130062-s256.pdf]

**A**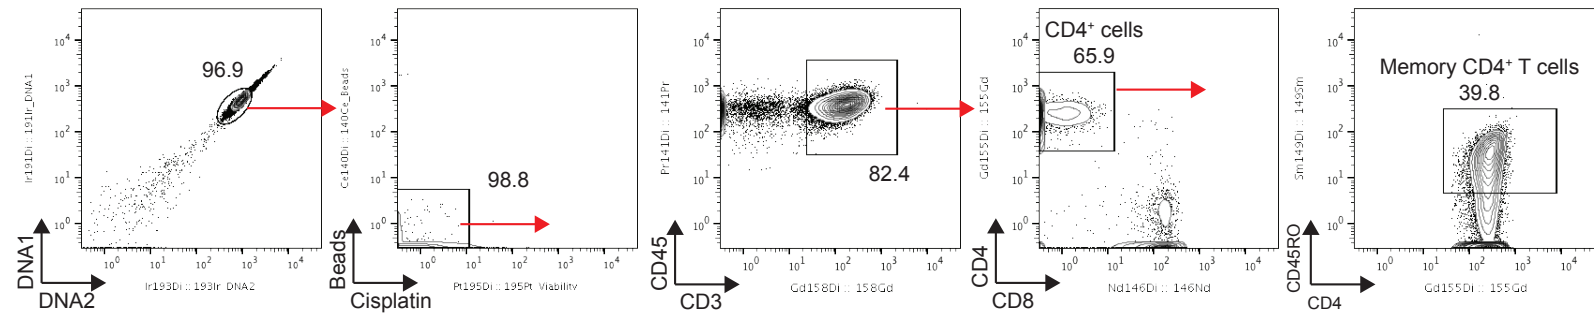**B**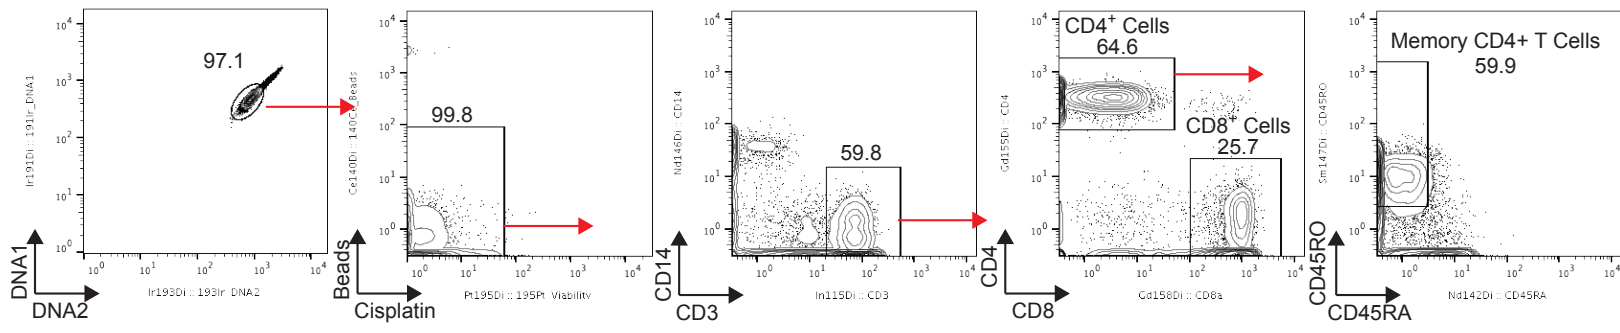**C**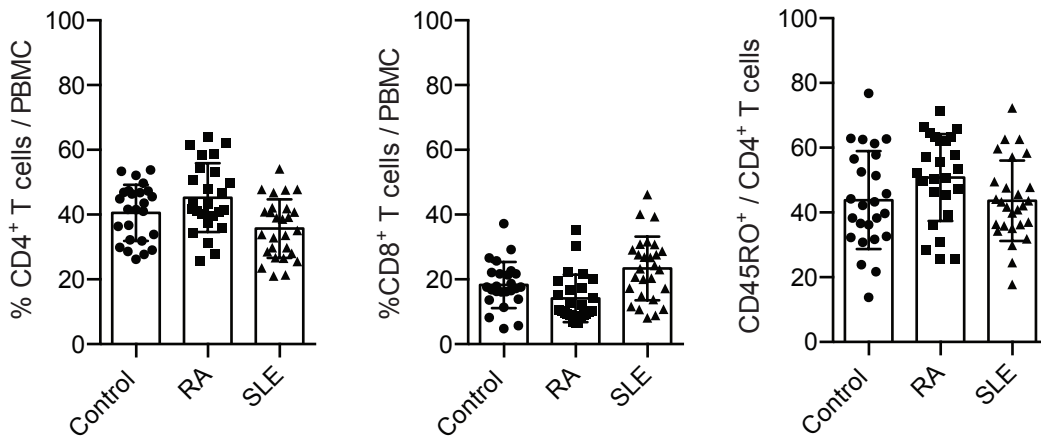

### Supplementary Figure 1: Identification of major T cell subsets in mass cytometry data.

A) Example of biaxial gating for T cell populations in the AMP mass cytometry data. B) Example of biaxial gating for T cell populations in the BWH validation cohort mass cytometry data.

C) Quantification of CD4+ T cells, CD8+ T cells, and memory CD4+ T cells in the AMP cohort. Error bars show median ± interquartile range.

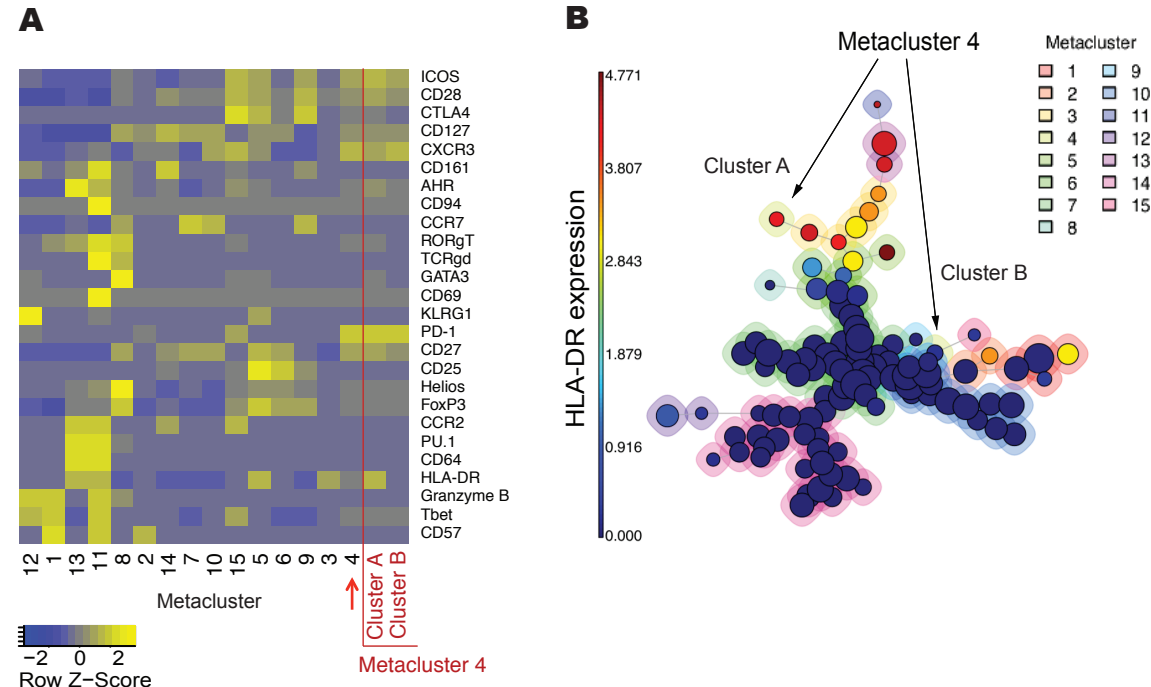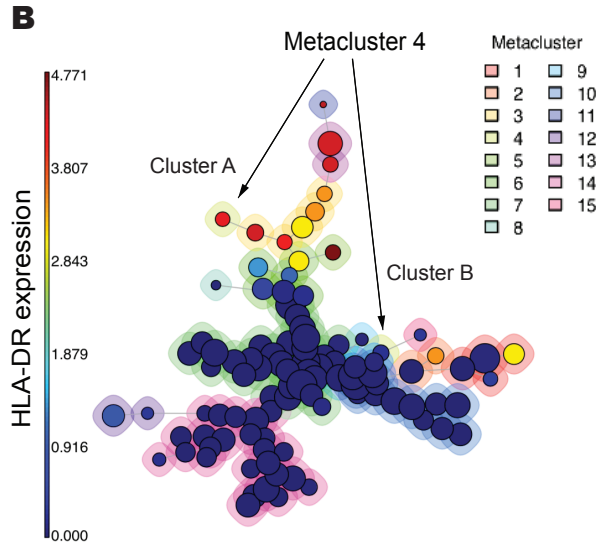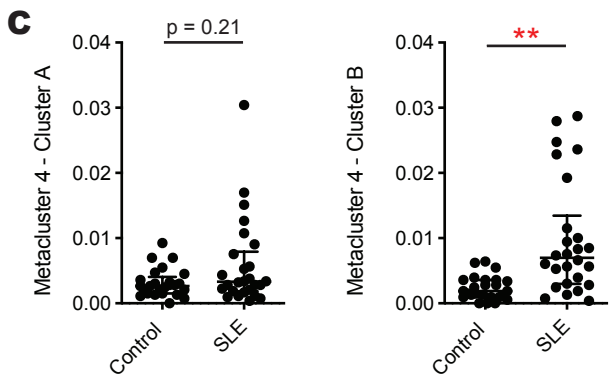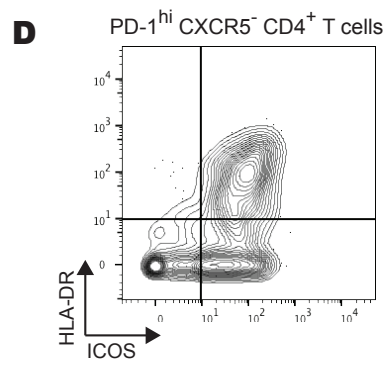

**Supplementary Figure 2: Phenotypic features of cells in metacluster 4.**

A) Heatmap of marker expression in FlowSOM metaclusters as in Figure 1D including the 2 clusters (cluster A, cluster B) that comprise metacluster 4. B) FlowSOM map demonstrating level of expression of HLA-DR in individual clusters. C) Abundance of the clusters that comprise metacluster 4, cluster A and cluster B, in SLE patients and controls as in Figure 1C. Error bars show median $\pm$ interquartile range. \*\* $p < 0.01$  by Mann-Whitney test. D) Example contour plot of expression of HLA-DR and ICOS on gated PD-1<sup>hi</sup> CXCR5<sup>-</sup> CD4<sup>+</sup> T cells in mass cytometry data.

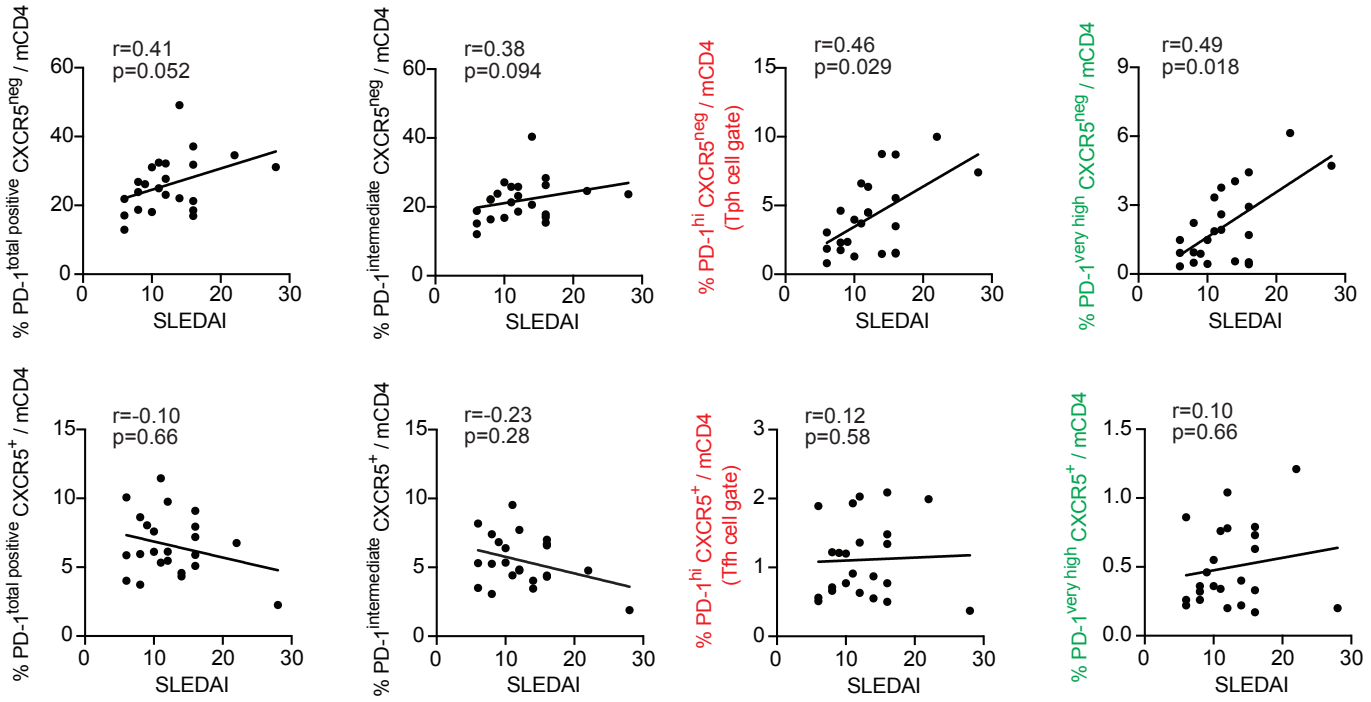

**Supplementary Figure 3: Correlation of PD-1<sup>+</sup> T cell populations with lupus disease activity.**

Correlation between lupus disease activity by SELANA-SLEDAI and the frequency of different CD4<sup>+</sup> T cell populations defined based on expression of CXCR5 and level of expression of PD-1 (n=21 patients). Spearman correlation statistics shown.

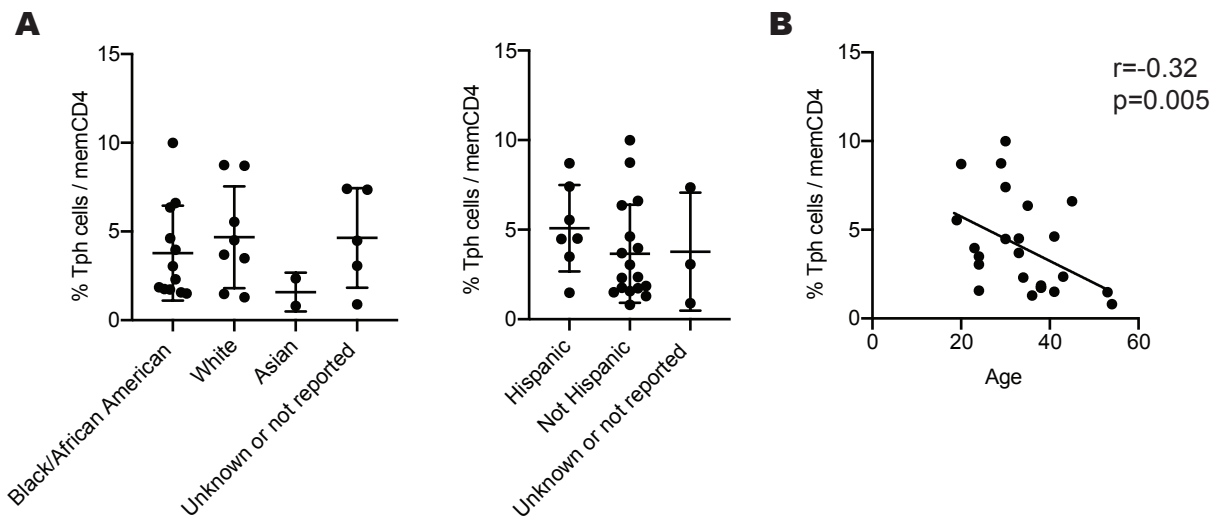

**Supplementary Figure 4: Tph cell frequencies in SLE patients according to race, ethnicity, and age.**

A) Tph cell frequency in SLE patients grouped by self-reported race or ethnicity. Error bars show mean±SD. B) Correlation between Tph cell frequency and age in SLE patients. Spearman correlation statistics shown.

**A**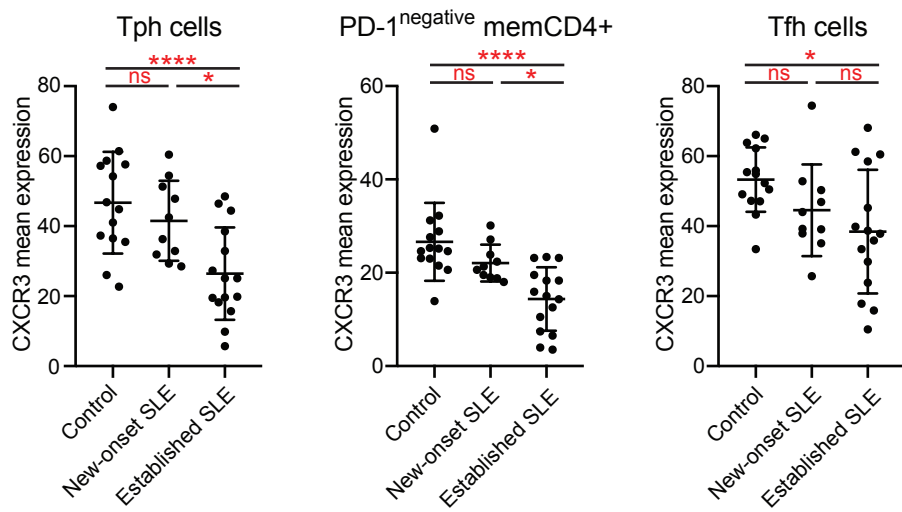**B**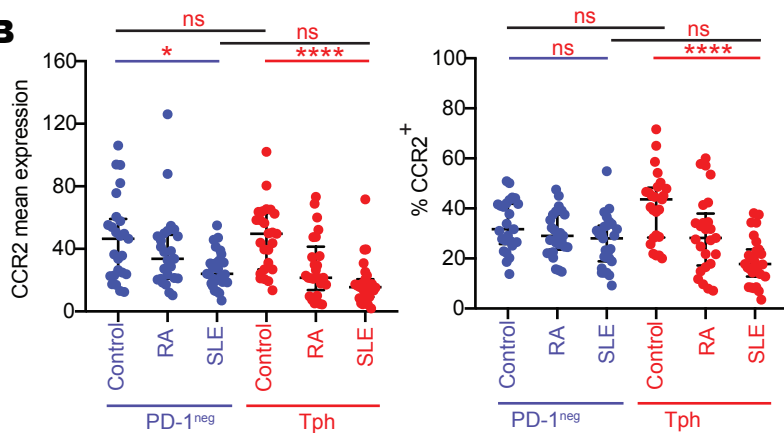**C**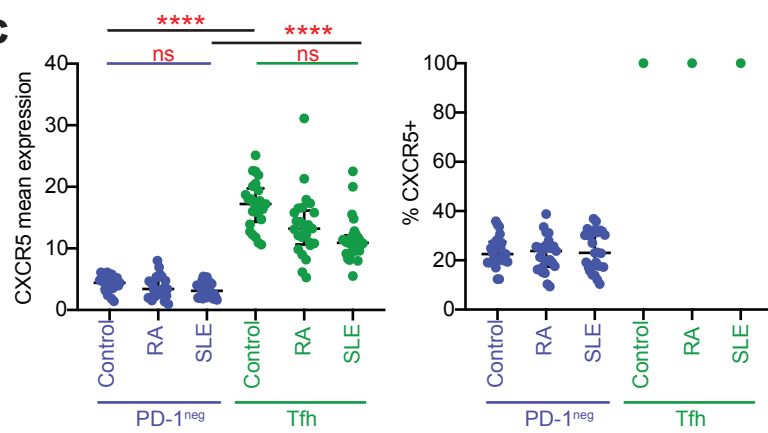**D**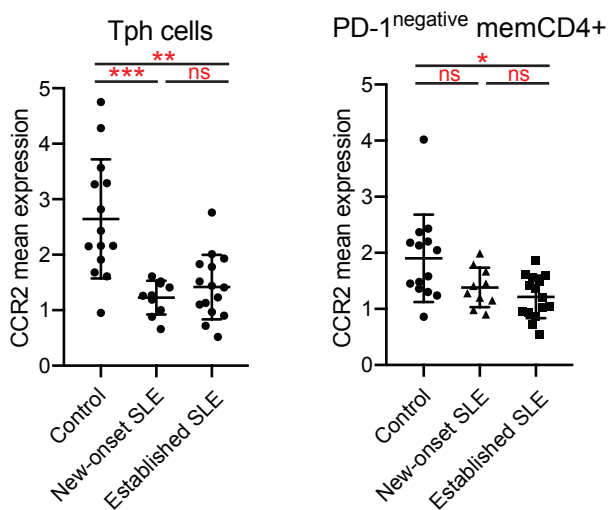**E**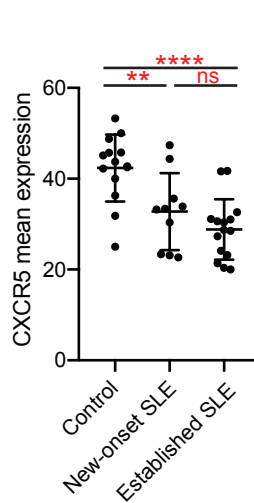

### Supplementary Figure 5: Chemokine receptor expression on Tph cells in SLE.

A) Mean expression of CXCR3 on Tph cells, Tfh cells, and PD-1<sup>neg</sup> memory CD4<sup>+</sup> T cells in mass cytometry analysis of samples from the BWH validation cohort. B) Mean expression of CCR2 and frequency of CCR2<sup>+</sup> cells in PD-1<sup>neg</sup> memory CD4<sup>+</sup> T cells and Tph cells from control (n=25), RA (n=25), and lupus nephritis (n=27) donors in the AMP cohort. C) Mean expression of CXCR5 and frequency of CXCR5<sup>+</sup> cells in PD-1<sup>neg</sup> memory CD4<sup>+</sup> T cells and Tfh cells as in (B). Tfh cells are CXCR5<sup>+</sup> by definition. D) Mean expression of CCR2 on Tph cells and PD-1<sup>neg</sup> memory CD4<sup>+</sup> T cells as in (A). E) Mean expression of CXCR5 on Tfh cells as in (A). Error bars show mean  $\pm$  SD. \* p < 0.05, \*\* p < 0.01, \*\*\* p < 0.001, \*\*\*\* p < 0.0001 by Kruskal–Wallis with Dunn's multiple comparisons test (A–E) statistics shown.

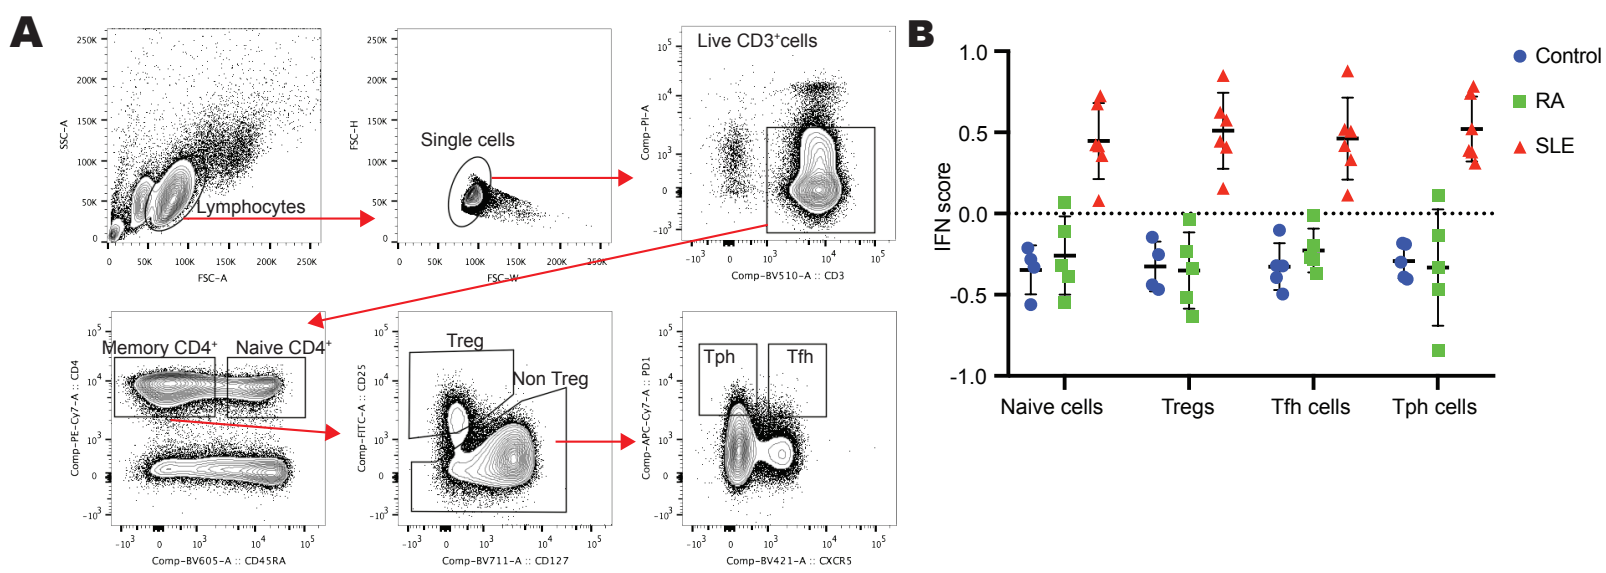

**Supplementary Figure 6: RNA-seq sorting and interferon scores in T cell populations.**

A) Example of gating for sorting T cell populations for RNA-seq. B) The interferon score was calculated for each T cell population from each donor using the RNA-seq transcriptomes. Plot shows the IFN score for controls (blue, n=4-5), RA patients (green, n=4-5), and SLE patients (red, n=6) for each T cell population. Error bars show mean±SD.

**A**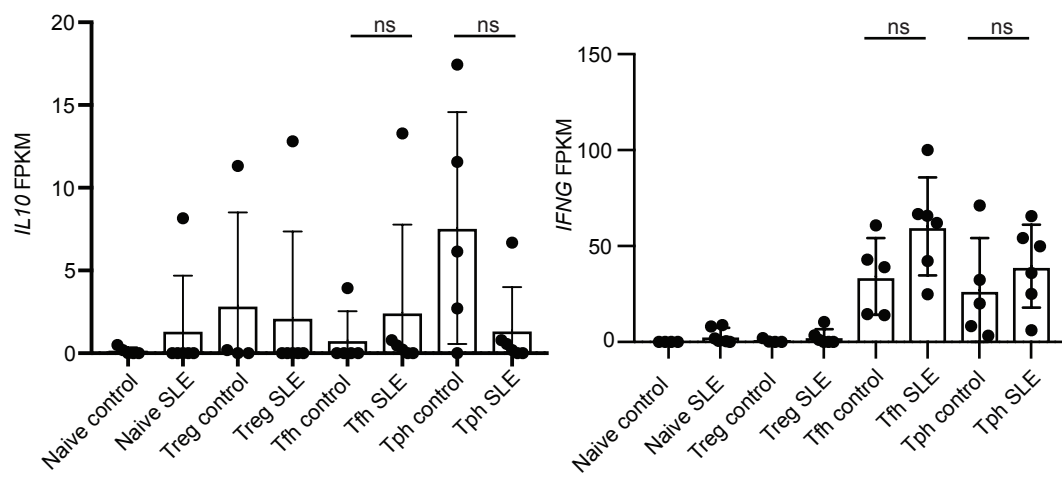**B**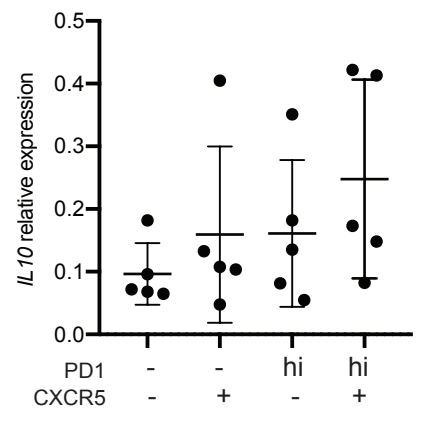

**Supplementary Figure 7: Expression of IL10 and IFNG in SLE Tph cells**

A) Expression of IL10 and IFNG in T cell subsets in RNA-seq data. B) IL10 expression by qPCR in PMA+ionomycin stimulated memory CD4<sup>+</sup> T cell subsets from SLE patients (n=4). Error bars show mean±SD (G). Mann Whitney test comparing Tph cells or Tfh cells from controls and SLE patients (A), or Kruskal–Wallis with Dunn’s multiple comparisons test (B).

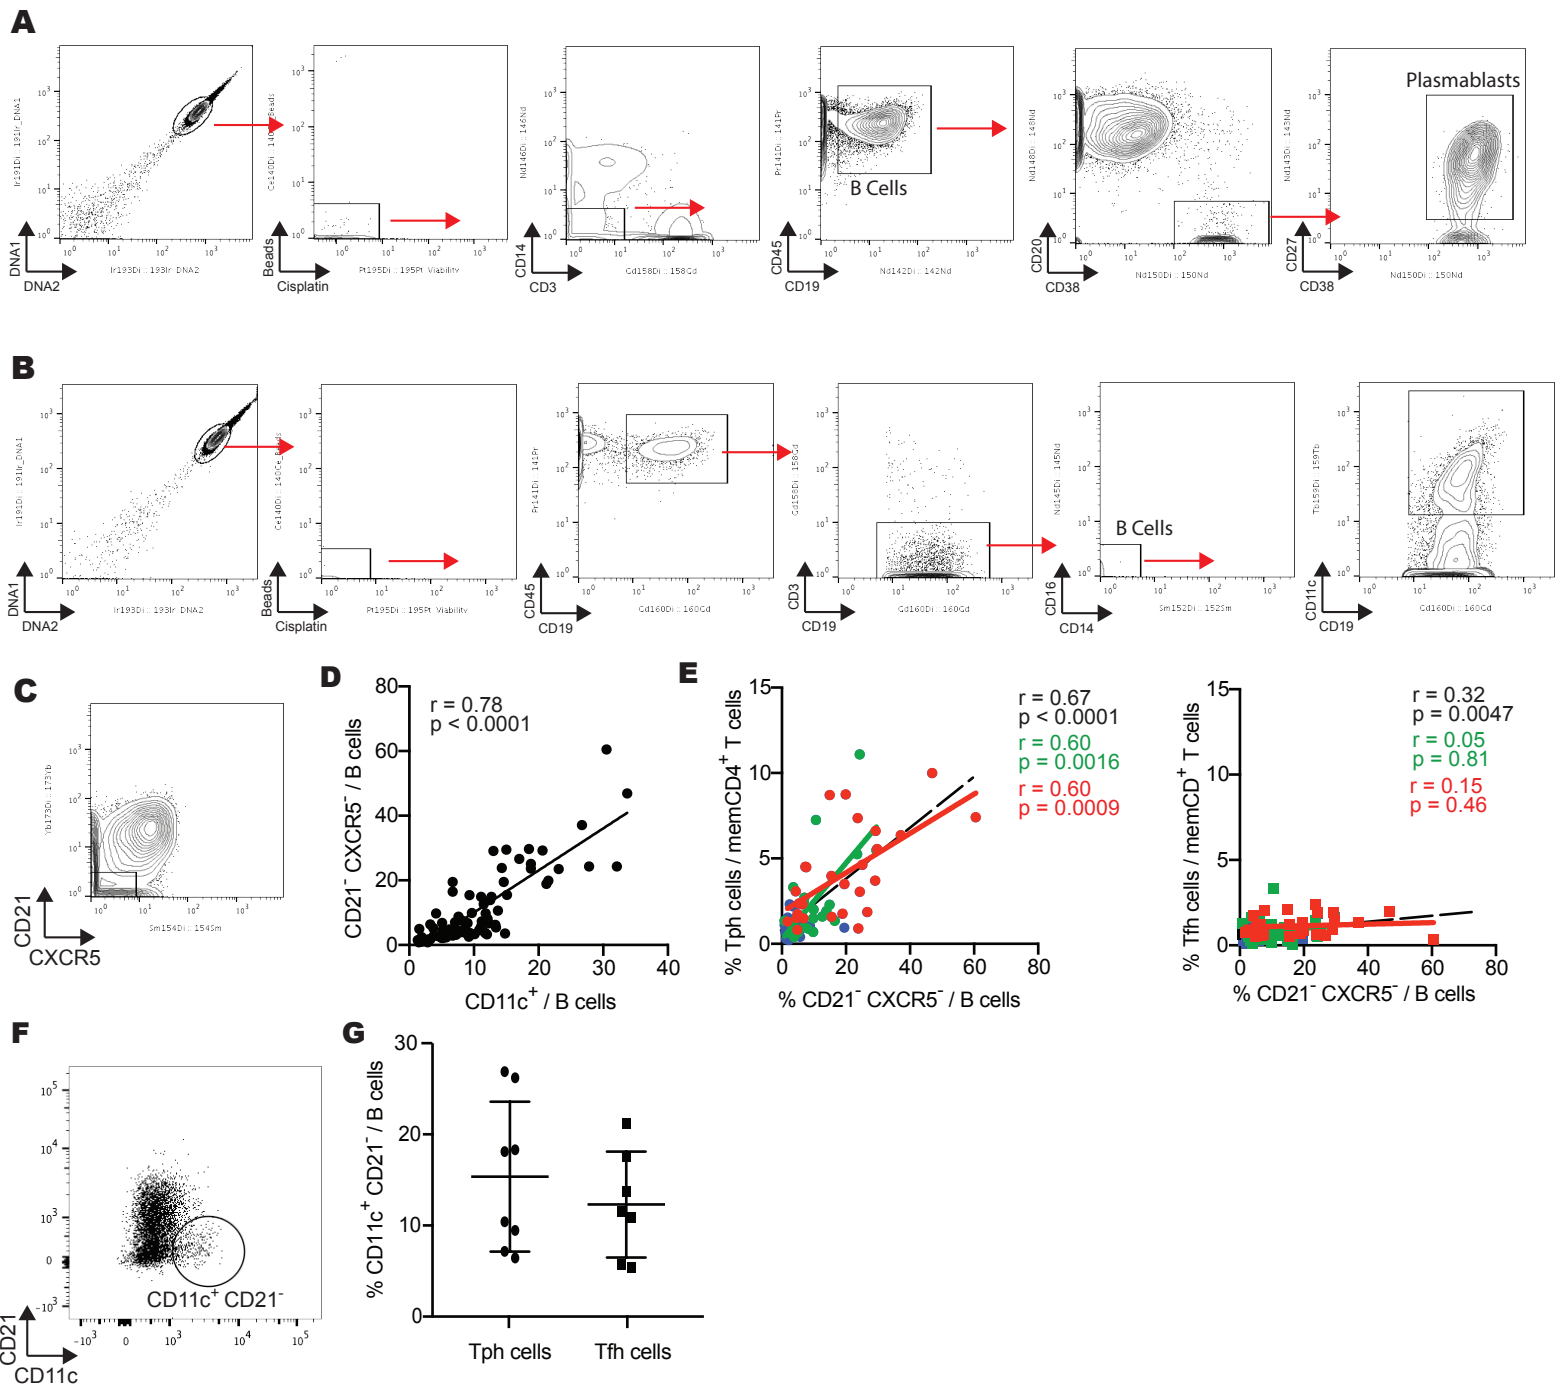

### Supplementary Figure 8: Tph cells correlate with CD11c<sup>+</sup> B cells.

A) Gating strategy for B cells and plasmablasts in the AMP mass cytometry data using the B cell panel. B) Gating strategy for CD11c<sup>+</sup> B cells in the AMP mass cytometry data using the myeloid panel. C) Example visualization of CD21 and CXCR5 on B cells gated as in (A) in the AMP mass cytometry data. D) Correlation between frequency of CD11c<sup>+</sup> B cells and CD21<sup>-</sup> CXCR5<sup>-</sup> B cells in all patients in the AMP cohort. E) Correlation between the frequency of Tph cells or Tfh cells and CD21<sup>-</sup> CXCR5<sup>-</sup> B cells in the AMP cohort (black = controls, green = RA patients, red = SLE patients). Spearman correlation statistics show (D,E). F) Example of detection of CD11c<sup>+</sup> CD21<sup>-</sup> B cells in co-cultures of memory B cells from controls co-cultured with indicated CD4<sup>+</sup> T cell subsets from SLE patients G) Quantification of CD11c<sup>+</sup> B cells among B cells (excluding plasmablasts) in co-cultures as in (F). Pooled data from 6 donors in 6 different experiments. Error bars show mean±SD.



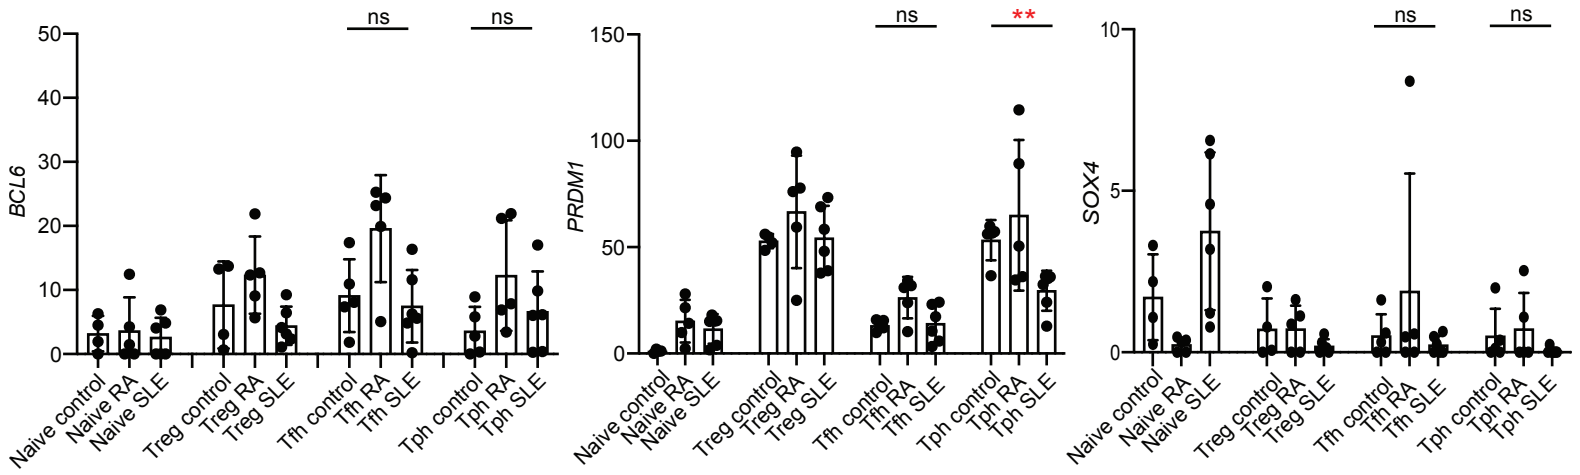

**Supplementary Figure 9: Expression of BCL6, PRDM1, and SOX4 in circulating Tph and Tfh cells.** Expression of BCL6, PRDM1, and SOX4 in T cell subsets in RNA-seq data. Error bars show mean±SD. \* p<0.05, \*\* p<0.01, \*\*\* p<0.001, \*\*\*\* p<0.0001 by Mann-Whitney test comparing Tph cells or Tfh cells from controls and SLE patients.

We recognize participants in Phase 1 of the Accelerating Medicines Partnership RA/SLE Network, which includes: Jennifer H. Anolik<sup>1</sup>, William Apruzzese<sup>2</sup>, Arnon Arazi<sup>3</sup>, Ami Ben Artzi<sup>4</sup>, John P. Atkinson<sup>5</sup>, Joan M. Bathon<sup>6</sup>, Celine C. Berthier<sup>7</sup>, David L. Boyle<sup>8</sup>, Michael B. Brenner<sup>1</sup>, S. Louis Bridges<sup>9</sup>, Jill P. Buyon<sup>10</sup>, Vivian P. Bykerk<sup>11</sup>, John A. Carrino<sup>11</sup>, Arnold Ceponis<sup>8</sup>, Adam Chicoine<sup>2</sup>, Robert Clancy<sup>10</sup>, Sean Connery<sup>12</sup>, Andrew C. Cordle<sup>13</sup>, Melissa Cunningham<sup>14</sup>, Maria Dall'Era<sup>15</sup>, Robert B. Darnell<sup>16</sup>, Anne Davidson<sup>17</sup>, Evan Der<sup>18</sup>, Betty Diamond<sup>17</sup>, Laura T. Donlin<sup>11</sup>, Andrea Fava<sup>19</sup>, Andrew Filer<sup>20</sup>, Gary S. Firestein<sup>8</sup>, Chamith Y. Fonseka<sup>2,3</sup>, Lindsay Forbess<sup>4</sup>, Richard A. Furie<sup>21</sup>, Anqi Gao<sup>2</sup>, Daniel Goldman<sup>19</sup>, Susan M. Goodman<sup>11</sup>, Ellen M. Gravallese<sup>2</sup>, Peter K. Gregersen<sup>17</sup>, Rohit Gupta<sup>22</sup>, Joel M. Guthridge<sup>23</sup>, Nir Hacohen<sup>3</sup>, David A. Hildeman<sup>24</sup>, Michael Holers<sup>25</sup>, Paul J. Hoover<sup>2</sup>, Diane Horowitz<sup>21</sup>, Raymond Hsu<sup>15</sup>, Laura B. Hughes<sup>9</sup>, Mariko L. Ishimori<sup>4</sup>, Lionel B. Ivashkiv<sup>11</sup>, Judith A. James<sup>23</sup>, A. Helena Jonsson<sup>2</sup>, Ruba Kado<sup>7</sup>, Ken C. Kalunian<sup>8</sup>, Diane L. Kamen<sup>14</sup>, Joshua Keegan<sup>2</sup>, Stephen Kelly<sup>26</sup>, Gregory Keras<sup>2</sup>, Mattias Kretzler<sup>7</sup>, James A. Lederer<sup>2</sup>, Peter Lowry<sup>25</sup>, Holden Maecker<sup>22</sup>, Arthur M. Mandelin<sup>27</sup>, Elena M. Massarotti<sup>2</sup>, Eric L. Matteson<sup>28</sup>, William J. McCune<sup>7</sup>, Mandy J. McGeachy<sup>13</sup>, Maureen McMahon<sup>29</sup>, Fumitaka Mizoguchi<sup>2</sup>, Larry W. Moreland<sup>13</sup>, Oganna Nwawka<sup>11</sup>, Dana E. Orange<sup>11</sup>, Meyeon Park<sup>15</sup>, Deborah Parks<sup>5</sup>, Fernanda Payan-Schober<sup>12</sup>, William F. Pendergraft<sup>30</sup>, Harris R. Perlman<sup>27</sup>, Alessandra B. Pernis<sup>11</sup>, Michelle Petri<sup>19</sup>, Mina Pichavant<sup>22</sup>, Costantino Pitzalis<sup>31</sup>, Chaim Putterman<sup>18</sup>, Deepak A. Rao<sup>2</sup>, Soumya Raychaudhuri<sup>2,3</sup>, Christopher Ritchlin<sup>1</sup>, William H. Robinson<sup>22</sup>, Karen Saloman-Escoto<sup>32</sup>, Daimon Simmons<sup>2</sup>, Kamil Slowikowski<sup>2,3</sup>, Hermant Suryawanshi<sup>33</sup>, Darren A. Tabechian<sup>1</sup>, Ralf G. Thiele<sup>1</sup>, Thomas Tuschl<sup>33</sup>, Paul J. Utz<sup>22</sup>, Dia Waguespack<sup>34</sup>, Gerald Watts<sup>2</sup>, Kevin Wei<sup>2</sup>, Michael Weisman<sup>4</sup>, Aaron Wise<sup>13</sup>, E. Steve Woodle<sup>35</sup>, David Wofsy<sup>15</sup>, Fan Zhang<sup>2,3</sup>.

- <sup>1</sup>University of Rochester Medical Center, Rochester, New York.
- <sup>2</sup>Brigham and Women's Hospital and Harvard Medical School, Boston, Massachusetts.
- <sup>3</sup>Broad Institute of Massachusetts Institute and Technology and Harvard University, Cambridge, Massachusetts.
- <sup>4</sup>Cedars-Sinai Medical Center, Los Angeles, California.
- <sup>5</sup>Washington University School of Medicine, Saint Louis, Missouri.
- <sup>6</sup>Columbia University, New York, New York.
- <sup>7</sup>University of Michigan, Ann Arbor, Michigan.
- <sup>8</sup>University of California, San Diego, La Jolla, California.
- <sup>9</sup>University of Alabama at Birmingham, Birmingham, Alabama.
- <sup>10</sup>New York University School of Medicine, New York, New York.
- <sup>11</sup>Hospital for Special Surgery, New York, New York.
- <sup>12</sup>Paul L. Foster School of Medicine, Texas Tech University Health Sciences Center, El Paso, Texas.
- <sup>13</sup>University of Pittsburgh Medical Center, Pittsburgh, Pennsylvania.
- <sup>14</sup>Medical University of South Carolina, Charleston, South Carolina.
- <sup>15</sup>University of California San Francisco, San Francisco, California.
- <sup>16</sup>New York Genome Center and the Rockefeller University, New York, New York.
- <sup>17</sup>The Feinstein Institute for Medical Research, Northwell Health, Manhasset, New York.
- <sup>18</sup>Albert Einstein College of Medicine and Montefiore Medical Center, Bronx, New York.
- <sup>19</sup>Johns Hopkins University, Baltimore, Maryland.
- <sup>20</sup>NIHR Birmingham Biomedical Research Centre, University Hospitals Birmingham NHS Foundation Trust and University of Birmingham, Birmingham, UK
- <sup>21</sup>Northwell Health, Great Neck, New York.
- <sup>22</sup>Stanford University School of Medicine, Stanford, California.
- <sup>23</sup>Oklahoma Medical Research Foundation, Oklahoma City, Oklahoma, USA.
- <sup>24</sup>University of Cincinnati and Cincinnati Children's Hospital Medical Center, Cincinnati, Ohio.

<sup>25</sup>University of Colorado School of Medicine, Aurora, Colorado.

<sup>26</sup>Barts Health NHS Trust, London, UK

<sup>27</sup>Northwestern University Feinberg School of Medicine, Chicago, Illinois.

<sup>28</sup>Mayo Clinic College of Medicine, Rochester, Minnesota.

<sup>29</sup>University of California Los Angeles, Los Angeles, California.

<sup>30</sup>The Integrative Medical Clinic of North Carolina, PLLC, Chapel Hill, North Carolina.

<sup>31</sup>William Harvey Research Institute, Queen Mary University of London, London, UK

<sup>32</sup>University of Massachusetts Medical School, Worcester, Massachusetts.

<sup>33</sup>Rockefeller University, New York, New York.

<sup>34</sup>University of Texas, Houston, Texas.

<sup>35</sup>University of Cincinnati College of Medicine, Cincinnati, Ohio.
